1 **Association of gut microbiota with cerebral cortex and cerebrovascular abnormality in**  
2 **human mild traumatic brain injury**

3 Lijun Bai<sup>1\*</sup>, Tianhui Li<sup>1</sup>, Ming Zhang<sup>2\*</sup>, Shan Wang<sup>1</sup>, Shuoqiu Gan<sup>1</sup>, Xiaoyan Jia<sup>1</sup>, Xuefei  
4 Yang<sup>1</sup>, Yinxiang Sun<sup>2</sup>, Feng Xiong<sup>1</sup>, Bo Yin<sup>3</sup>, Yi Ren<sup>4</sup>, Guanghui Bai<sup>5</sup>, Zhihan Yan<sup>5</sup>, Xin Mu<sup>6</sup>,  
5 Feng Zhu<sup>†6,7,8</sup>

6 1. The Key Laboratory of Biomedical Information Engineering, Ministry of Education,  
7 Department of Biomedical Engineering, School of Life Science and Technology,  
8 Xi'an Jiaotong University, Xi'an, China

9 2. Department of Medical Imaging, the First Affiliated Hospital of Xi'an Jiaotong  
10 University, Xi'an, China

11 3. Department of Neurosurgery, the Second Affiliated Hospital and Yuying Children's  
12 Hospital of Wenzhou Medical University, Wenzhou 325027, China

13 4. Department of Rehabilitation Medicine, the Hanzhong Central Hospital, Hanzhong  
14 723000, China

15 5. Department of Radiology, the Second Affiliated Hospital and Yuying Children's Hospital  
16 of Wenzhou Medical University, Wenzhou 325027, China

17 6. Center for Translational Medicine, the First Affiliated Hospital of Xi'an Jiaotong  
18 University, 277 Yanta West Road, Xi'an 710061, China.

19 7. Center for Brain Science, the First Affiliated Hospital of Xi'an Jiaotong University, 277  
20 Yanta West Road, Xi'an 710061, China.

21 8. Clinical Research Center for Psychiatric Medicine of Shaanxi Province, the First Affiliated  
22 Hospital of Xi'an Jiaotong University, 277 Yanta West Road, Xi'an 710061, China.

23 †This author supervised this work: F. Z. zhufeng0714@163.com

24 \*These authors contributed equally to this work.

25

## 1 **Abstract**

2 Key roles of the gut–brain axis in brain injury development have been suggested in various  
3 mouse models; however, little is known about its functional significance in human mild  
4 traumatic brain injury (TBI). Here, we decipher this axis by profiling the gut microbiota in 98  
5 acute mild TBI patients and 62 matched controls, and subgroup of them also measured  
6 circulating mediators and applied neuroimaging. Mild TBI patients had increased  $\alpha$ -diversity  
7 and different overall microbial compositions compared with controls. 25-microbial genus  
8 classifiers distinguish patients from controls with an area under the receiver operating  
9 characteristic curve (AUC) of 0.889, while adding serum mediators and neuroimaging features  
10 further improved performance even in a small sample size (AUC = 0.969). Numerous  
11 correlations existed between gut bacteria, aberrant cortical thickness and cerebrovascular injury.  
12 Co-occurrence network analysis revealed two unique gut–brain axes in patients: 1) altered  
13 intestinal *Lachnospiraceae\_NK4A136\_group* and *Eubacterium\_ruminantium\_group*-  
14 increased serum GDNF-subcallosal hypertrophy and cerebrovascular injury; 2) decreased  
15 intestinal *Eubacterium\_xylanophilum\_group*–upregulated IL-6–thinned anterior insula. Our  
16 findings provide a new integrated mechanistic understanding and diagnostic model of mild TBI.

17

18

19

20

21

22

23

24

## 1 **Introduction**

2 Traumatic brain injury (TBI) is a public health challenge of vast but insufficiently recognized  
3 proportions. It is estimated that more than 50 million people worldwide suffer at least one TBI  
4 in any given year, and approximately half the world's population will have one or more TBIs  
5 over their lifetime<sup>1</sup>. TBI is the leading cause of mortality in young adults and a major cause of  
6 disability across all ages; although there has been a great deal of researches seeking insights  
7 into its pathogenesis, the ongoing pathophysiology of TBI has not been fully elucidated<sup>2, 3</sup>.  
8 Recent studies have demonstrated key roles of the microbiome–gut–brain axis in mediating  
9 various neuroinflammatory, neurodevelopmental and neurodegenerative diseases<sup>4</sup>. Intestinal  
10 dysfunction is highlighted as one of the most common but neglected consequences of TBI<sup>2, 3</sup>.  
11 Several psychological and physiological disturbances following TBI are known to be sufficient  
12 to alter the balance of gut homeostasis maintained by the microbial ecosystem and host immune  
13 system, with results including traumatic stress<sup>5</sup>, dysfunctional intestinal contractility and  
14 motility<sup>6, 7</sup>, and increased gut permeability<sup>8</sup>. Accordingly, animal studies have revealed  
15 profound changes in gut microbiota after various nerve injuries<sup>6, 7</sup>, such as stroke spinal cord  
16 injury<sup>8</sup> and TBI<sup>4, 5</sup>. More importantly, gut dysbiosis in animal models is not merely a byproduct  
17 of injury but an essential contributory factor to TBI-related neuropathology and impaired  
18 behavioral outcomes<sup>9</sup>. In contrast to the plentiful evidence<sup>9</sup> from animal studies, the gut  
19 microbiome of human patients with TBI has been poorly characterized. Considering the high  
20 value of gut microbes in disease diagnosis and prognosis prediction, there is an urgent need to  
21 systematically examine the composition and functional capacity of gut microbiota in relation  
22 to TBI.

23 The most severe outcome of TBI in terms of public health comes from long-lasting progressive  
24 neurobehavioral sequelae<sup>10</sup>, including a heightened risk of several psychiatric and  
25 neurodegenerative diseases<sup>11, 12</sup>. Even mild TBI is one of the strongest environmental risk

1 factors facilitating the development of neurodegenerative diseases, an observation that has been  
2 validated widely by population-based studies<sup>12</sup>. For example, mild TBI is a well-established  
3 risk factor for a variety of neurodegenerative diseases including Parkinson disease (PD) and  
4 dementia, with significant effects that persist for decades after injury<sup>12</sup>. Recently, the regulatory  
5 role of gut microbiota in pathophysiology has been revealed with the strongest evidence in  
6 PD<sup>13, 14</sup> and a growing appreciation of its role in Alzheimer's disease (AD)<sup>15</sup> and stroke<sup>9, 16</sup>.  
7 However, the biological mechanisms linking TBI and increased risk of those neurobehavioral  
8 sequelae are still unknown. Longitudinal studies are the best approach to analyze the effects of  
9 microbiota on the development of these sequelae; however, such long follow-up periods will  
10 postpone the solution of this urgent scientific problem. Another effective method to gain insight  
11 into the roles of gut dysbiosis in long-term prognosis is to investigate the relationships between  
12 post-injury microbiota alterations and the well-known risk factors/phenotypes related to  
13 neurobehavioral sequelae.

14 Neuroimaging is a rapidly growing technology to noninvasively characterize brain structural  
15 and functional alterations in vivo under pathological conditions. Mild TBI accounts for 80-90%  
16 of all cases of TBI in both civilian and military populations<sup>17</sup>. Unlike moderate to severe brain  
17 injury, mild TBI cannot be diagnosed by conventional CT and MRI. Insight into the  
18 neuropathophysiology of mild TBI in humans is mainly dependent on cortical structural and  
19 functional changes. Our team, together with other groups, has identified several specific  
20 neuroimaging signatures of mild TBI and demonstrated the crucial roles of  
21 interhemispheric structural and functional connectivity damage<sup>18</sup> and alterations in the default-  
22 mode network<sup>19</sup> in chronic brain lesion development after injury. Moreover, accelerated aging  
23 processes are exhibited in the brains of patients with mild TBI, including accelerated brain  
24 atrophy<sup>20</sup> and microvascular injury (our unpublished data). Brain atrophy/cortical thinning is a  
25 common pathology for multiple neurodegenerative and mental disorders<sup>21, 22</sup>. Brain

1 microvascular injury represents ischemia, hemorrhage, blood–brain barrier (BBB) disruption,  
2 local inflammation/immune activation, and neuron death. Cerebrovascular injury in mild TBI  
3 has been revealed by both postmortem imaging and histological examination, including  
4 hypointensity on T<sub>2</sub>\*-weighted MRI (white matter (WM) hyperintensity, WMH) that  
5 colocalizes with iron-laden macrophages<sup>23</sup>. These aberrant cerebrovascular changes  
6 synergistically interact with neurodegenerative pathologies, such as decreased cortical  
7 thickness, lowering the threshold for AD<sup>24-27</sup>. Neuroimaging is currently the most important  
8 technology to characterize brain function in living human subjects; therefore, we focus on the  
9 interaction between gut microbiota and neuroimaging phenotypes, which is key to  
10 understanding the functionality of the human microbiota–gut–brain axis. Primary evidence has  
11 also shown that the human gut microbiome profile is significantly associated with  
12 cerebrovascular dysfunction and brain structure. Regarding the cortical thinning and  
13 microvascular injury involved in mild TBI, the modulatory effects of the gut microbiome on  
14 these features are still unclear. Thus, we sought to characterize the gut microbiome signature  
15 of individuals with mild TBI and identify gut microbes associated with two common neural  
16 phenotypes involved in both brain injury and its long-term neurobehavioral  
17 sequelae/comorbidities, i.e., cortical morphology<sup>28</sup> and microvascular injury<sup>23</sup>.

18 Here, we profiled the gut microbiota of 98 patients with mild TBI and 62 well-matched healthy  
19 controls (HCs) via 16S rRNA sequencing. To identify specific alterations in the gut–brain axis,  
20 we also compared potential circulating mediators and brain structural and functional traits  
21 between patients and controls. The relationships among dysbiotic gut microbiota, 6 increased  
22 serum molecules that may link the gut and brain, aberrant cerebral morphology and  
23 microvascular injury (WMH), and symptom severity (Rivermead Post-Concussion Symptom  
24 Questionnaire, RPCS) were analyzed to identify the gut–brain axis abnormalities underlying  
25 mild TBI. Based on these alterations in the gut–brain axis, we further constructed several

1 diagnostic models that performed very well in discriminating patients from controls.

## 2 **Results**

3 **The gut microbiota profile of mild TBI patients.** A total of 98 patients with mild TBI and 62  
4 matched HCs were included in this study. There were no significant differences in demographic  
5 or clinical characteristics between these two groups ( $P > 0.05$ ; Table 1; detailed data in  
6 Supplementary Data 1). The gut microbiota of mild TBI patients exhibited increased  $\alpha$ -  
7 diversity at the genus level, including the Chao1 and abundance-based coverage (ACE) indices,  
8 compared with that of HCs ( $P = 0.031$  and  $0.011$ , respectively; Wilcoxon rank-sum test shown  
9 in Fig. 1a and b). Additionally, the comparison of  $\beta$ -diversity indexes based on both the  
10 unweighted UniFrac distance and Bray-Curtis dissimilarity indicated that the overall  
11 microbiota composition of patients with mild TBI varied markedly from that of HCs (all  $P =$   
12  $0.001$ , permutational multivariate analysis of variance (PERMANOVA); Fig. 1c and  
13 Supplementary Fig. 1). At each taxonomic level from phylum to genus, we identified numerous  
14 classical taxa that were differentially enriched in mild TBI patients (Supplementary Data 2). At  
15 the phylum level, the abundance of Firmicutes, one of the most dominant phyla in the healthy  
16 gut, was markedly decreased in the mild TBI group ( $P = 0.011$ , Wilcoxon rank-sum test; Fig.  
17 1d and e). At the genus level, linear discriminant analysis (LDA) effect size (LEfSe) analysis  
18 revealed that 72 bacterial taxa with LDA scores  $> 2.0$  and 15 bacterial taxa with LDA scores  $>$   
19  $3.0$  displayed statistically significant differences in relative abundance between the patients  
20 and the controls after adjusting for age, gender, body mass index (BMI), smoking, drinking and  
21 bowel habits ( $P < 0.05$ ; Fig. 1f; Supplementary Data 3). Compared with controls, 15  
22 differentially enriched genera with LDA scores  $> 3.0$  were identified in the gut of patients with  
23 mild TBI, including 8 upregulated bacteria, namely, *Escherichia\_Shigella*,  
24 *Ruminococcus\_gnavus\_group*, *Bifidobacterium*, *uncultured\_f\_Muribaculaceae*, *Lactobacillus*,  
25 *Clostridium\_innocuum\_group*, *Catenibacterium*, and *Alloprevotella*, and 9 downregulated



1  
2 **Fig. 1. Comparisons of  $\alpha$ -diversity and  $\beta$ -diversity between patients with mTBI (n = 98)**  
3 **and HCs (n = 62).** The number of Chao1 index (a) and ACE index (b) were significantly increased  
4 in mTBI compared with controls.  $P$  values were calculated via the Wilcoxon rank-sum test. (c) PCoA  
5 based on the unweighted UniFrac matrix showed that the overall fecal microbiota composition was  
6 different between patients and controls ( $P = 0.001$ ).  $P$  values were calculated via the PERMANOVA  
7 test. (d) Firmicutes were significantly decreased in mTBI compared with controls.  $P$  values were  
8 calculated via the Wilcoxon rank-sum test. (e) Relative proportions of bacterial phyla are presented in  
9 mTBI and controls. (f) LDA effect size analysis revealed that the relative abundance of 17 genera was  
10 significantly different between mTBI and controls. Boxes represent the medians and interquartile ranges  
11 (IQRs) between the 25th and 75th percentiles; whiskers represent the lowest or highest values within  
12 1.5 times IQR from the first or third quartiles. mTBI, mild traumatic brain injury; HCs, healthy controls;  
13 PCoA, principal coordinate analysis; LDA, linear discriminant analysis. See detailed statistical data in  
14 Supplementary Source Data file.

1 bacteria, namely, *Prevotella\_7*, *Dorea*, *Dialister*, *Eubacterium\_ruminantium\_group*,  
2 *Fusicatenibacter*, *Lachnospiraceae\_NK4A136\_group*, *Fusobacterium*, *Agathobacter*, and  
3 *Faecalibacterium*. Next, co-occurrence correlations between 72 mild TBI-associated gut  
4 microbial genera at LDA score  $> 2.0$  were shown in a network (Supplementary Fig. 2).  
5 Intriguingly, the genera enriched in mild TBI were more interconnected than those enriched in  
6 controls ( $\rho < -0.4$  or  $> 0.4$ ,  $P < 0.05$ ). A relatively isolated network including 21 genera was  
7 present in the gut of patients; this network was characterized by extensive strong positive  
8 associations ( $\rho > 0.6$ ) among the genera within the network and a few weak associations  
9 between the genera inside and outside the network. The representative bacteria in this relatively  
10 isolated network comprised *Anaeromyxobacter*, *Bradyrhizobium*, *Desulfatiglans*, *Eubacterium*,  
11 *Sphingomonas*, *Sulfuricurvum*, *Thiobacillus*, *Ochrobactrum*, and others (Supplementary Fig.  
12 2).

13

14 **Functional potential of the gut microbiota in mild TBI.** Functional modules and pathways  
15 enriched in the gut microbiota of patients compared with controls were analyzed using the  
16 Kyoto Encyclopedia of Genes and Genomes (KEGG) database (Supplementary Data 4). We  
17 screened out the KEGG categories that were differentially enriched by the gut microbiota of  
18 patients via PICRUSt. Statistical Analysis of Metagenomic Profiles (STAMP) analysis detected  
19 19 KEGG pathways and modules that were significantly different between mild TBI patients  
20 and controls ( $P < 0.05$ , false discovery rate (FDR)  $< 0.05$ ). Briefly, mild TBI-depleted microbial  
21 functional modules included insulin resistance, epithelial cell signaling in *Helicobacter pylori*  
22 infection and peptidoglycan biosynthesis, whereas mild TBI-enriched functional modules  
23 included type I polyketide structures, bile secretion, the synaptic vesicle cycle, retrograde  
24 endocannabinoid signaling, lipoic acid metabolism, and others. (Fig. 2a). Next, we predicted  
25 the alterations in microbial high-level phenotypes using BugBase<sup>29</sup>. Compared with the



1

2 **Fig. 2. The functional prediction of gut microbiota in mTBI and HCs. (a)** KEGG Orthology

3 (KO) represented enriched functional pathways between HCs (n = 62) and mTBI (n = 98). **(b-e)**

4 BugBase predicted bacterial community phenotypes in both groups. *P* values were determined by the

5 Mann-Whitney-Wilcoxon test. Boxes represent the medians and interquartile ranges (IQRs) between

6 25th and 75th percentile; whiskers represent the lowest or highest values within 1.5 times IQR from the

7 first or third quartiles. mTBI, mild traumatic brain injury; HCs, healthy controls. See detailed statistical

8 data in Supplementary Source Data file.

1 controls, facultatively anaerobic bacteria, gram-negative bacteria and microbial oxidative  
2 stress tolerance were upregulated ( $P = 0.01, 0.004, 0.023$ , respectively) while gram-positive  
3 bacteria and anaerobic bacteria ( $P = 0.004, 0.048$ , respectively) were downregulated in mild  
4 TBI patients (Wilcoxon rank-sum test; Fig. 2b-f).

5  
6 **Gut microbiota signatures of mild TBI.** To evaluate the diagnostic potential of the gut  
7 microbiome in mild TBI, we constructed a series of random forest disease classifiers based on  
8 72 microbial genera that were differentially enriched between patients and controls. This  
9 analysis was conducted with a five-fold cross-validation procedure ten times. A total of 25  
10 genera reached the lowest classifier error in the random forest cross-validation, and the area  
11 under the receiver operating characteristic curve (AUC) of this model was 0.895 (95% CI,  
12 0.847-0.944; Fig. 3a). This microbial classifier was not significantly influenced by age, gender,  
13 BMI, or diet style (Supplementary Data 5). The traditional biomarkers for mild TBI are a few  
14 molecules in blood and cerebrospinal fluid (CSF)<sup>30</sup>. In the present study, we compared between  
15 20 serum biomarkers between mild TBI patients and controls. Of which, 6 serum biomarkers  
16 presented significant increases in mild TBI patients after controlling for age, gender and BMI  
17 (all for  $P < 0.05$ , Supplementary data 6). To further examine whether the combined gut bacteria  
18 and blood serum biomarkers can obtain better diagnostic potential, we screened 72 candidate  
19 molecules and 6 increased serum biomarkers with differential abundance in patients compared  
20 with controls entered into the random forest model. Finally, a 20-factor classifier including 14  
21 microbial genera and 6 serum markers fulfilled the lowest classifier error in the random forest  
22 cross-validation, with an AUC of 0.954 (95% CI, 0.917-0.991; Fig. 3b), which also displayed  
23 a better diagnostic performance than the classifier of only 6 serum molecules with AUC of  
24 0.913 (95% CI, 0.859-0.967, Supplementary Fig. 3). The contribution of each gut bacterium or  
25 serum molecule to the diagnostic model was shown in Fig. 3c and d. The abundances and



1

2 **Fig. 3. Gut microbiome and serum molecule-based discrimination between mTBI patients**

3 **and HCs. (a)** Receiver operating characteristic curve (ROC) based on 98 mTBI patients from 62 HCs

4 was calculated by cross-validated random forest models. The area under the ROC curve (AUC) and the

5 95% confidence intervals (CI) are also shown. **(b)** The combination of both gut microbiota and blood

6 serum biomarkers as classifiers was selected by cross-validated random forest models to discriminate

7 56 patients from 46 controls. The AUC and the 95% confidence intervals are also shown. **(c)** The 25

1 forest models. The length of the line indicates the contribution of the genus to the discriminative model.  
2 The color of each genus indicated its enrichment in mTBI patients (red) or HCs (blue). **(d)** The 6 serum  
3 biomarkers and 14 genera with the most weight to discriminate mTBI and HCs were selected by cross-  
4 validated random forest models. The length of the line indicates the contribution of the genus to the  
5 discriminative model. The color of each genus indicated its enrichment in mTBI patients (red) or HCs  
6 (blue). The relative level ( $\log_2$ ) of 14 genus abundance **(e)** and 6 serum biomarker **(f)** classifiers used  
7 in the diagnosis model **(d)**. Each dot represents one value from an individual participant, and the boxes  
8 represent the medians and interquartile ranges (IQRs) between the first and third quartiles; whiskers  
9 represent the lowest or highest values within 1.5 times IQR from the first or third quartiles. Outliers are  
10 not shown. mTBI, mild traumatic brain injury; HCs, healthy controls. See detailed statistical data in  
11 Supplementary Source Data file.

12

13 concentrations of these gut bacterial genera and serum molecules for the 20-factor classifiers  
14 were shown in Fig. 3e and f. The overlaps between the 25-genus classifier and the 14-genus,  
15 6-serum-molecule classifier included 12 bacterial genera: *Eubacterium\_ruminantium\_group*,  
16 *Ruminiclostridium*, *Ruminococcus\_1*, *uncultured\_f\_Muribaculaceae*, *Psychrobacter*,  
17 *Fusobacterium*, *Ruminococcaceae\_UCG\_003*, *Sphingomonas*, *Bradyrhizobium*,  
18 *Catenibacterium*, *uncultured\_c\_Anaerolineae*, and *Rubus\_hybrid\_cultivar*.

19

20 **Gut bacteria underlying brain pathology and symptoms.** Next, we analyzed the effects of  
21 72 mild TBI-associated bacteria on three types of disease-related phenotypes, i.e., RPCS scores,  
22 serum blood biomarkers, cortical thickness and cerebrovascular injury (WMH) (Fig 4a-d).  
23 Regarding the RPCS, 16 microbial genera displayed significant associations with symptom  
24 severity as measured by total RPCS scores, mainly including *Clostridium\_innocuum\_group*,  
25 *Hungatella* and *Sphingomonas* (all for  $P < 0.02$ ,  $FDR < 0.21$ ,  $\rho > 0.27$ ; Supplementary Data 7;  
26 Fig. 4a). Additionally, the abundance of *Clostridium\_innocuum\_group* and *Sphingomonas* was

1 positively correlated with three subscores of the RPCS, namely, headache, being irritable and  
2 fatigue (all for  $P < 0.05$ ,  $FDR < 0.21$ ,  $\rho > 0.25$ ), while *Lachnospiraceae\_NK4A136\_group*,  
3 *Eubacterium\_ruminantium\_group* and *uncultured\_f\_Muribaculaceae* were negatively  
4 correlated with sleep disturbance and being irritable in mild TBI patients ( $P < 0.05$ ,  $FDR <$   
5  $0.28$ ,  $|\rho| > 0.23$ ). Next, we compared WMH and cortical thickness between mild TBI patients  
6 and controls. Total WMH volumes displayed nominally significant increases in mild TBI  
7 patients compared with HCs after controlling for age, sex, education and ICV (intracranial  
8 volume, brain plus associated CSF with the inner table of the skull as the outer boundary of the  
9 segmented image) ( $F_{5, 40} = 3.772$ ,  $P = 0.059$ ; Fig. 4e). Increased WMH volumes were also  
10 identified in the frontal and temporal lobes of mild TBI patients ( $F_{5, 40} = 4.74$  and  $6.31$ ,  $P =$   
11  $0.036$  and  $0.016$ , respectively; Fig. 4f and g). With respect to brain morphological changes, we  
12 found that mild TBI patients had markedly decreased cortical thickness in the right anterior  
13 insula and left hippocampus/parahippocampus (Hipp/PH) and increased cortical thickness in  
14 the right subcallosal compared with controls after adjusting for age, sex, education and ICV  
15 ( $F_{1, 54} = 10.24$ ,  $5.22$ ,  $4.74$ , all for  $P < 0.05$ , FDR corrected; Fig. 4h-j). Next, partial Spearman's  
16 rank-based correlation analysis was conducted to analyze the associations of gut microbiota  
17 with 6 serum molecules and 6 neuroimaging features exhibiting significant between-group  
18 differences, controlling for age, gender, BMI, education, smoking, drinking and bowel habits  
19 (Supplementary Data 8). A total of 26 microbial genera displayed significant correlations with  
20 at least one type of disease-related phenotype and were mainly present in the group of patients  
21 (Fig. 4h-j). Intriguingly, six genera displayed associations with multiple phenotypes (for both  
22 serum molecules and neuroimaging features). *Lachnospiraceae\_NK4A136\_group* associated  
23 with RPCS symptoms and exhibiting diagnostic potential significantly correlated with not only  
24 GDNF but also the right subcallosal and frontal WMH ( $P = 0.00008$ ,  $\rho = 0.528$ ;  $P = 0.005$ ,  $\rho =$   
25  $-0.685$ ;  $P = 0.021$ ,  $\rho = 0.608$ ). The *Eubacterium\_ruminantium\_group* associated with RPCS

1 symptoms and diagnostic potential was negatively correlated with the right subcallosal  
2 thickness and positively correlated with GDNF ( $P = 0.003$ ,  $\rho = -0.805$ ;  $P = 0.001$ ,  $\rho = 0.45$ ,  
3 respectively). The *Clostridium\_innocuum\_group* associated with RPCS symptoms and  
4 diagnostic potential was also positively associated with the left Hipp/PH thickness and  
5 negatively associated with GDNF ( $P = 0.01$ ,  $\rho = 0.641$ ;  $P = 0.009$ ,  $\rho = -0.365$ , respectively).  
6 *Achromobacter* was positively correlated with VEGF-A and subcallosal thickness ( $P = 0.006$ ,  
7  $\rho = 0.386$ ;  $P = 0.022$ ,  $\rho = 0.587$ , respectively). *Eubacterium\_xylanophilum\_group* was  
8 negatively correlated with IL 6 and cortical thickness of the right anterior insula ( $P = 0.042$ ,  $\rho$   
9  $= -0.289$ ;  $P = -0.041$ ,  $\rho = -0.532$ ). *Robinsoniella* was negatively associated with IL 6 and  
10 positively related with cortical thickness in the left Hipp/PH ( $P = 0.044$ ,  $\rho = -0.286$ ;  $P = 0.037$ ,  
11  $\rho = 0.541$ ).

12

13 **Two associations between gut bacteria and brain aberrations in mild TBI.** Next, we  
14 explored the relationships among gut microbiota, circulating molecules, and brain structural  
15 and functional abnormalities via a co-occurrence correlation network (Fig. 5a). We define a  
16 gut–brain axis as a series of co-occurrence correlation networks that link gut bacteria, serum  
17 mediators, and cerebral traits (denoted as nodes) (Fig. 5b). We defined the node degree as a  
18 metric to quantify the number of edges (i.e., connections) connected to that node. For both  
19 serum mediators and cerebral traits, important node hubs were then defined as node degree  $>$   
20 3, including GDNF, VEGF-A, and IL 6 in serum mediators, as well as the anterior insula  
21 thickness, subcallosal thickness and frontal WMH in cerebral traits. Finally, two axes were  
22 identified: 1) a gut bacteria–GDNF–subcallosal thickness–WMH axis and 2) a gut bacteria–  
23 IL-6–anterior insula axis. In the gut bacteria–GDNF–subcallosal thickness–WMH axis, mild  
24 TBI-associated *Clostridium\_innocuum\_group*, *Lachnospiraceae\_NK4A136\_group*, and  
25 *Eubacterium\_ruminantium\_group* were related to post-concussion symptom severity (all for  $P$



1

2 **Fig. 4. Associations between gut microbiota, RPCS, blood serum molecules and brain**

3 **features in mTBI.** Patients (n = 20) presented a nonsignificant difference in the total WMH (a) and

4 a significantly higher WMH in the frontal lobe (b) and parietal lobe (c) compared with HCs (n = 39).

5 One-way analysis of variance (ANOVA) indicated that patients showed increased cortical thickness in

6 the right subcallosal gyrus (d) and decreased cortical thickness in the right anterior insula (e) and left

1 hippocampus/parahippocampus (Hipp/PH) (f). Partial Spearman correlation analysis was first  
2 conducted between 72 genera (LDA > 2.0) and total (or subitem) RPCS (g), serum biomarkers (h),  
3 cortical thickness (i) and WMH (j) in the mild TBI, healthy controls and total subject groups. Only the  
4 top 15 genera with higher relation coefficients for each correlation type were finally presented on the  
5 heatmap. \* indicates  $P < 0.05$ . mTBI, mild traumatic brain injury; HCs, healthy controls. See detailed  
6 statistical data in Supplementary Source Data file.

7 < 0.05) and serum GDNF level (all for  $P < 0.01$ ). *Lachnospiraceae\_NK4A136\_group* and  
8 *Eubacterium\_ruminantium\_group* were also associated with cortical thickness of the  
9 subcallosal area (all for  $P < 0.005$ ). Moreover, circulating GDNF correlated with not only three  
10 gut bacteria but also total WMH and subcallosal cortex thickness ( $P = 0.022$ ,  $\rho = 0.568$ ;  $P =$   
11  $0.011$ ,  $\rho = -0.599$ , respectively). In the gut bacteria–IL-6–cortical thickness axis,  
12 *Eubacterium\_xylanophilum\_group* negatively correlated with both IL-6 and cortical thickness  
13 of the right anterior insula, and accordingly, IL-6 also correlated with cortical thickness of the  
14 right anterior insula ( $P = 0.046$ ,  $\rho = 0.489$ ). Next, we sought to determine whether these two  
15 axes are specifically presented in patients with mild TBI. We found that these co-occurrence  
16 correlations among gut bacteria, serum mediators, and cerebral traits in each axis were not  
17 significant in controls. 6 classifiers with top 40% important weights in the diagnose model, 5  
18 neuroimaging features that varied markedly between patients and controls, and/or 5 gut genera  
19 displayed associations with both serum molecules and neuroimaging features were further  
20 entered into LASSO regression analyses, in order to explore the diagnose potential of mild TBI  
21 from HCs. Finally, a 6-factor classifier including 1 microbial genera, 3 serum markers and 2  
22 neuroimaging features provided a good identification of mild TBI from HCs with an AUC of  
23 0.969 (95% CI, 0.928-1; Supplementary Fig. 4).



1

2 **Fig. 5. Co-occurrence network of gut microbiome, serum molecules and brain alterations**

1 **in mild TBI patients. (a)** An illustration map of their associations. **(b)** Associations of gut genera  
2 with serum molecules and/or brain alterations. Node size represented the node degree denoting as the  
3 number of edges (i.e., connection) connected to that node. The color of the edge represents positive (red,  
4  $\rho > 0.2, P < 0.05$ ) and negative (gray,  $\rho < -0.2, P < 0.05$ ). Hipp/PH, hippocampus/parahippocampus;  
5 mTBI, mild traumatic brain injury. See detailed statistical data in Supplementary Source Data file.

## 6 **Discussion**

7 Here, we integrated three types of datasets from two terminals of the gut–brain axis, i.e., the  
8 gut microbiome and neuroimaging traits, and from certain circulating mediators as important  
9 regulators to implicate potential mechanistic links in the gut–brain axis of mild TBI. For the  
10 first time, we identified two unique altered gut–brain axes in mild TBI associated with serious  
11 symptoms. Previous studies on animal models<sup>31</sup> and human studies<sup>32</sup> have mainly focused on  
12 alterations in the brain or biomarkers and have failed to enrich our understanding of the systems  
13 biology underlying mild TBI<sup>33</sup>. Our findings outlined more integrative pathological  
14 mechanisms underlying mild TBI. Over the past five years, numerous dysbiotic gut bacteria  
15 have been identified in neuropsychiatric conditions, but alterations in the pattern/mode of gut–  
16 brain communication are rarely explored in humans. The extensive co-occurrence correlations  
17 between dysbiotic bacteria, circulating mediators, and abnormal brain traits suggested that  
18 pathway-level changes indeed exist in the gut–brain axis following TBI.

19 Systemic communications between the gut and brain are regulated by some mediators in the  
20 blood, such as immune modulatory metabolites, gut peptides, neurotransmitters, and  
21 cytokines<sup>34</sup>. We screened 6 mild TBI-associated serum molecules from 20 candidates, some of  
22 which are accepted as serum biomarkers for TBI<sup>35, 36</sup>. Of these 6 molecules, GDNF and IL-6  
23 were identified as key hub nodes linking dysbiotic gut microbiota and aberrant brain traits in a  
24 co-occurrence network and marked two unique alterations in the gut–brain axis. The altered

1 axis of gut bacteria–GDNF-subcallosal thickness and WMH included two differentially  
2 regulated gut bacteria (*Lachnospiraceae\_NK4A136\_group* and  
3 *Eubacterium\_ruminantium\_group*), increased serum GDNF, and thicker subcallosal area in  
4 patients with mild TBI. The subcallosal area is one of largest neurogenic regions in the adult  
5 brain. Our results revealed, for the first time, that the subcallosal gyrus became thickened  
6 within 5 post-injury days (PID)<sup>2-5</sup> following mild TBI, consistent with previous mouse animal  
7 evidence that posttraumatic gliogenesis in the adult brain is contributed by progenitor  
8 populations in the subcallosal area<sup>37</sup>. Although the functional roles of subcallosal gyrus  
9 thickening in TBI development are still unclear, the strongly positive correlation between  
10 subcallosal thickness and symptom severity ( $r = 0.64$ ) suggested that hypertrophy of this area  
11 was implicated in brain pathology following mild TBI. Downregulated  
12 *Lachnospiraceae\_NK4A136\_group* and *Eubacterium\_ruminantium\_group* after injury were  
13 positively associated with GDNF levels. The negative associations of GDNF and these two  
14 bacteria with subcallosal hypertrophy further implicated that post-injury increased GDNF  
15 secretion and bacterium proliferation enhanced the inhibition of cortical thickening in this brain  
16 region, which relieved symptom severity.

17 Moreover, these gut bacteria may modulate the subcallosal gyrus by influencing WM  
18 myelination and cerebrovascular injury. The subcallosal area is situated below the genu of the  
19 corpus callosum (CC), and WM myelination of the genu of the CC is reported to decline as  
20 visible cerebrovascular injury increases in the form of WMH and captures individual variability  
21 in systemic vascular health<sup>38</sup>. Disorganized axonal interconnections in efferent pathways from  
22 the frontal white matter can also modulate the cortical thickness of the subcallosal area<sup>39</sup>.  
23 WMH may provide an additive “second hit” impact on neural transmission along the white  
24 matter pathways, which affects the cortical thickness of the subcallosal area. In this way, TBI  
25 can be considered a trigger, as well as a useful model to understand certain pathological features

1 of neurological disorders, since it is apparent that the combination of vascular pathology and  
2 neurodegenerative changes (i.e., cortical thickness alteration) is additive, lowering the  
3 threshold of dementia risk<sup>40</sup>. In the present study, we also found elevated VEGF-A levels in  
4 acute mild TBI, and upregulated *Achromobacter* can further predict higher levels of VEGF-A  
5 and subcallosal hypertrophy. VEGF has a strong capacity to augment neurogenesis and  
6 angiogenesis after TBI, especially in vessels<sup>41, 42</sup>. In support of mild TBI instantiating the link  
7 with neurodegenerative disorders, intestinal microbes can regulate the core pathology features  
8 of both WMH and cerebral morphological changes underlying both neurological disorders and  
9 highlight the possibility of therapeutic advances in disease treatment through modulation of the  
10 gut microbiota.

11 Another obvious altered axis of the gut–brain in mild TBI was characterized by downregulated  
12 *Eubacterium\_xylanophilum\_group*, increased serum IL-6 levels, and cortical thinning of the  
13 anterior insula. The anterior insula serves as the primary cortical destination for afferent  
14 interoceptive signals from the entire gastrointestinal tract<sup>43</sup>. Cortical thinning of the anterior  
15 insula has consistently been reported in many chronic inflammatory and painful visceral  
16 conditions, including inflammatory bowel diseases and irritable bowel syndrome<sup>44, 45</sup>. Our  
17 previous study indicated that systemic inflammation activation occurs in patients with mild  
18 TBI in the acute phase of injury and last for the 3-month follow-up period<sup>32</sup>. Therefore, the  
19 thinned anterior insula after mild TBI may be due to a dysfunctional inflammatory response to  
20 injury. Here, we further demonstrated that increased serum IL-6 was positively correlated with  
21 the cortical thickness of the anterior insula, suggesting that promoted IL-6 secretion is a  
22 protective factor to suppress this cortical atrophy. The gut *Eubacterium\_xylanophilum\_group*  
23 decreased after injury and was negative for IL-6 and anterior insula thickness. It is indicated  
24 that the more this bacterium decreased, the higher serum IL-6 and the thicker anterior insula,  
25 and the less serious mild TBI symptoms. There are also three other bacteria associated with

1 serum IL-6, which highlights the modulatory roles of gut microbiota in the immune-brain  
2 interactions involved in mild TBI. It is a major challenge to determine the function of gut  
3 bacteria in pathological processes, especially in the human gut microbiome. Although animal  
4 studies have found some evidence for a disease-causing role of the gut microbiome in brain  
5 injury, their applicability to humans is not conclusive<sup>46</sup>. The extensive differences between  
6 humans and rodents remind us to be very cautious regarding translating laboratory findings  
7 into clinical applications<sup>47</sup>. These two gut–brain axes in mild TBI are preliminarily elucidated  
8 by our human data, and future studies need to determine the causal effects between these factors  
9 in the gut–brain axis and the underlying biological mechanisms.

10 To the best of our knowledge, this is the first study to profile gut microbiota in human TBI.  
11 Our data indicated that gut dysbiosis was marked at 3-5 days PID. Mild TBI significantly  
12 altered the abundances of 7 in 14 phyla, 10 in 22 classes, 26 in 44 orders, 35 in 76 families,  
13 and 61 in 205 genera in the gut with FDR < 0.05. By then, a total of 4 published animal  
14 studies<sup>48-51</sup> investigated gut bacteria after TBI and reported that altered gut microbiota emerged  
15 at PID 1 and remained significant at PID 3, and gut dysbiosis recovered at PID 7. Accordingly,  
16 we selected PID 2-5 as the time of our fecal sample analysis in patients. Rodent studies also  
17 found obviously decreased  $\alpha$ -diversity of gut microbiota in animals exposed to TBI<sup>49, 50</sup>, which  
18 is in contrast to our findings indicating greater  $\alpha$ -diversity in patients. Moreover, more  
19 differentially enriched phyla, families and genera were found in the present study of human  
20 TBI than those identified by the rodent model of TBI. These discrepancies in findings can be  
21 attributed to the intrinsic differences in gut microbiota and host physiology between humans  
22 and animals, as well as to the varied exposure factor (mild vs. moderate-severe TBI) or  
23 sampling location (feces vs. cecum/jejunum). Some consistent findings also existed between  
24 our human study and previous animal studies, for example, decreased *Firmicutes* and  
25 *Deferribacteres* and increased *Bacteroidetes* and *Proteobacteria*<sup>49, 50</sup> in phylum, increased

1 *Enterobacteriaceae* family<sup>49</sup>, decreased *Eubacterium ventriosum* and increased *Clostridiales*  
2 and *Eubacterium* genera<sup>51</sup>. These overlapping bacterial alterations between injured humans and  
3 animals suggest that similar bacteria-modulating effects are exerted by common  
4 pathophysiological processes underlying human and rodent TBI.

5 One important application of the microbial signature of a given disease is to develop objective  
6 diagnostic markers. Identifying microbial diagnostic markers is especially crucial for mild TBI,  
7 as the traditional diagnostic approach is not effective and is dependent on the recall of patients  
8 about subjective symptoms or CT scans. Notably, all of our patients with mild TBI had negative  
9 CT and were very challenging to diagnose clinically. Here, we constructed a diagnostic model  
10 of 25 gut bacteria that discriminates patients from controls with an AUC of 0.86. The diagnostic  
11 effect of this model is comparable to some well-defined traditional serum biomarkers of mild  
12 TBI, such as tau, NFL, and GFAP (AUC: ~0.85)<sup>30</sup>. Moreover, we found that a combination of  
13 14 gut bacteria and 6 serum biomarkers further increased diagnostic performance (AUC: 0.954).  
14 Therefore, gut bacteria should be considered when adding serum biomarkers to improve  
15 diagnostic accuracy. Apart from the diagnostic application, these mild TBI-associated gut  
16 bacteria can also be used for translational research. Mild TBI is now a paucity of effective  
17 treatments. Two types of probiotics, *Lactobacillus acidophilus* and *Clostridium butyricum*,  
18 have been shown to exert neuroprotective effects in mice with TBI<sup>2</sup>. Considering that gut  
19 dysbiosis has been shown to contribute to brain injury-related neuropathology and impaired  
20 behavioral outcomes in experimental models of animals<sup>49, 51</sup>, we proposed that some TBI-  
21 associated bacteria may participate in and even drive some pathophysiological processes.  
22 Therefore, differentially presented bacteria in the gut of patients can be candidates for  
23 screening future disease-causing bacteria and functional mechanism analysis in animals, as  
24 well as therapeutic significance evaluation for future clinical trials. In conclusion, our findings  
25 provide a new integrated mechanistic understanding and diagnostic model for mild TBI.

## 1 **Methods**

2 **Subject recruitment and clinical assessment.** This study was conducted in accordance with  
3 the Declaration of Helsinki and approved by the Medical Ethics Committee of The First  
4 Affiliated Hospital of Xi'an Jiaotong University (TFAHXJU). It is a publicly  
5 registered clinical trial (Identifier: NCT02868671; <https://clinicaltrials.gov>). All participants  
6 signed written informed consent in person. Patients with mild TBI were recruited from patients  
7 who had non-contrast head CT because of acute head trauma in the emergency departments of  
8 three hospitals, TFAHXJU, the Second Affiliated Hospital and Yuying Children's Hospital of  
9 Wenzhou Medical University and Hanzhong Central Hospital. All of mild TBI patients had  
10 negative CT scans. The diagnosis of mild TBI was based on the World Health Organization's  
11 Collaborating Centre for Neurotrauma Task Force<sup>52</sup> as described in our previous study<sup>19</sup>. The  
12 inclusion criteria included *i*) Glasgow Coma Score of 13-15; *ii*) one or more of the following:  
13 loss of consciousness (if present) < 30 min, posttraumatic amnesia (if present) < 24 h, and/or  
14 other transient neurological abnormalities such as focal signs and seizure. Mild TBI  
15 participants were excluded following the criteria: *i*) history of neurological disease, long-  
16 standing psychiatric condition, head injury, spinal cord injury or a history of substance or  
17 alcohol abuse; *ii*) intubation and/or presence of a skull fracture and administration of sedatives  
18 on arrival in the emergency department; *iii*) manifestation of mild TBI due to medications by  
19 other injuries (e.g., systemic injuries, facial injuries, or intubation) or other problems (e.g.,  
20 psychological trauma, language barrier, or coexisting medical conditions) or caused by  
21 penetrating craniocerebral injury; *iv*) routine laboratory test (blood, urine, stool routine, liver  
22 function, renal function) abnormalities, active gastrointestinal diseases or major organic  
23 diseases; *v*) the cumulative intake of alcohol greater than 100 ml in the past week; *vi*) antibiotics,  
24 probiotics, or prebiotic uses in the past month. HCs did not have any neurological or psychiatric  
25 disorders and were well matched to the patients on demographic features (see Supplementary

1 Data 1). Clinical postconcussive symptoms were assessed via the RPCS<sup>53</sup>, which measured the  
2 presence and severity of 17 somatic symptoms commonly experienced following head injury  
3 (see Supplementary Data 9).

4 **Fecal Sample Collection and DNA Extraction.** Fecal samples from all subjects were  
5 collected within 7 acute days postinjury ( $2.54 \pm 1.13$  postinjury days) and stored at  $-80^{\circ}\text{C}$   
6 within one hour after collection in the hospital. DNA was extracted using the Qiagen QIAamp  
7 DNA Stool Mini Kit (Qiagen, Germany) following the manufacturer's instructions. DNase-  
8 free RNase was used during extraction to eliminate RNA contamination. Isolated DNA was  
9 quantified using a Qubit 3.0 Fluorometer with a PicoGreen Assay Kit (Thermo Fisher,  
10 Shanghai).

11 **16S rRNA amplicon sequencing.** The V3-V4 region of the 16S rRNA gene was amplified  
12 from total fecal DNA using a pair of universal primers as 338F: 5'-  
13 ACTCCTACGGGAGGCAGCA-3' and 806R: 5'-GGACTACHVGGGTWTCTAAT-3'. The  
14 PCR volume of 10  $\mu\text{L}$  included 0.2  $\mu\text{L}$  KOD FX Neo, 5  $\mu\text{L}$  KOD FX Neo Buffer, 0.5  $\mu\text{L}$  DNA  
15 template (50 ng/mL), 0.3  $\mu\text{L}$  forward prime (10 mmol/L), 0.3  $\mu\text{L}$  reverse prime (10 mmol/L),  
16 dNTP 2.0  $\mu\text{L}$ , and the rest volume of ddH<sub>2</sub>O. After an initial denaturation at 95  $^{\circ}\text{C}$  for 5 min,  
17 amplification was performed by 25 cycles of incubation for 30 s at 95  $^{\circ}\text{C}$ , 30 s at 50  $^{\circ}\text{C}$ , and  
18 40 s at 72  $^{\circ}\text{C}$ , followed by a final extension at 72  $^{\circ}\text{C}$  for 7 min. Then, the amplified products  
19 were purified and recovered using the 1.0% agarose gel electrophoresis method. Library  
20 preparation and sequencing were performed on an Illumina HiSeq 2500 Platform with paired-  
21 end 250 bp sequences at the Beijing Biomarker Technologies Co., Ltd. (Beijing, China).

22 **Bioinformatic analysis.** All analyses were completed on the Biomarker BioCloud platform  
23 ([www.biocloud.org](http://www.biocloud.org)) as described in ref.<sup>54</sup>. First, we used FLASH (version 1.2.11;  
24 <http://ccb.jhu.edu/software/FLASH/>) to merge raw reads and then filter high-quality reads by  
25 Trimmomatic (version 0.33; <http://www.usadellab.org/cms/?page=trimmomatic>) and

1 UCHIME (version 8.1; <https://omictools.com/uchime-tool>). Subsequently, we clustered the  
2 denoised tags into operational taxonomic units (OTUs) with similarity  $\geq 97\%$  using  
3 USEARCH<sup>55</sup> (version 10.0; <http://www.drive5.com/usearch/>) and obtained the OTU unique  
4 representative sequences. Taxonomy was assigned to all OTUs by searching against the Silva  
5 databases (Release128; <https://www.arb-silva.de/>) using the RDP classifier within QIIME  
6 (version 2.2; <http://qiime.org/>).

7  **$\alpha$ -Diversity,  $\beta$ -diversity and functional analysis.**  $\alpha$ -diversity (Chao1 Index, ACE Index,  
8 Shannon's Index, Simpson index and observed OTUs) was calculated by Mothur<sup>56</sup> (version  
9 1.30; <http://mothur.org/>).  $\beta$ -diversity was calculated based on the Bray-Curtis dissimilarity and  
10 unweighted and weighted UniFrac metrics using QIIME (version 2.2). Between-group  
11 comparisons for  $\alpha$ -diversity and  $\beta$ -diversity were conducted using the Wilcoxon rank-sum test  
12 and PERMANOVA, respectively. Principal coordinate analysis (PCoA) with unweighted  
13 UniFrac distance matrices was performed to ordinate the dissimilarity matrices, and statistical  
14 significance was obtained using the PERMANOVA test. The between-group differences in  
15 relative abundance were determined by the LDA effect size (LEfSe) pipeline<sup>57</sup>. The 16S RNA  
16 sequences were used to impute the metagenomes of the gut microbiome with PICRUSt  
17 (Phylogenetic Investigation of Communities by Reconstruction of Unobserved States) as  
18 described previously, and the difference between mild TBI and the control was identified with  
19 Welch's t-test in STAMP (v2.1.3)<sup>58</sup>.

20 **Serum biomarker detection.** All blood samples were collected within the same day as the  
21 fecal sample. The current serum sample (56 mild TBI patients and 46 matched HCs) included  
22 a proportion of participants involved in our previous studies that measured a 9-plex panel of  
23 inflammatory cytokines<sup>32</sup>. Details for the collection and analysis of these cytokines can be  
24 found in Sun et al<sup>55</sup>. These cytokines included *i*) the archetypal proinflammatory cytokines IL-  
25  $1\beta$ , IL-6, and IL-12 and the anti-inflammatory cytokines IL-4 and IL-10; *ii*) chemokine (C-C

1 motif) ligand 2 or monocyte chemoattractant protein-1 (CCL2 or MCP-1) and member of the  
2 CXC chemokine family (CXCL8) IL-8; *iii*) interferon- $\gamma$  (IFN- $\gamma$ ); and *iv*) tumor necrosis factor  
3  $\alpha$  (TNF- $\alpha$ ). In the present study, we also included more serum biomarkers, such as *i*)  
4 neurotrophins, including brain-derived neurotrophic factor (BDNF), cell line-derived  
5 neurotrophic factor (GDNF), GDNF-15, vascular endothelial growth factor A (VEGF-A),  $\beta$ -  
6 nerve growth factor ( $\beta$ -NGF); *ii*) neuron-specific enolase (NSE), ubiquitin carboxyl-terminal  
7 hydrolase isozyme L1 (UCH-L1), intercellular adhesion molecule (ICAM); *iii*) Park7/DJ,  
8 synuclein- $\alpha$ , and IFN- $\gamma$ .

9 Serum samples were collected in the morning at 07:00-08:00 h and centrifuged, and aliquots  
10 of supernatant were stored at -80 °C until analysis. Serum biomarkers (pg/ml) were measured  
11 using reagents on a Luminex multiplex bead system (Luminex Austin, TX, USA). A  
12 fluorescence detection laser optic system was used to simultaneously detect binding of each  
13 individual protein onto microspheres, thereby allowing analysis of several analyses in a single  
14 sample. Intra- and interassay coefficients of variation for Luminex quantification were < 20%  
15 and 25%, respectively. Samples with levels that were undetectable by the assay were set to 0.01  
16 pg/ml.

17 **MRI Data Acquisition.** All MRI scans were conducted within 24 h of fecal sample collection.  
18 Twenty-one mild TBI patients and thirty-nine demographically matched HCs (named the  
19 neuroimaging subgroup) were randomly selected from the whole cohort and received MRI  
20 scanning. The MRI (3T GE 750) protocol mainly included the high-resolution T1-weighted 3D  
21 MPRAGE sequence (TE = 3.17 ms, TR = 8.15 ms, flip angle = 9°, slice thickness = 1 mm,  
22 field of view (FOV) = 256 × 256 mm, matrix size = 256 × 256), and T2 fluid-attenuated  
23 inversion recovery (FLAIR; TR = 8000 ms, TE = 94 ms, flip angle = 150°, thickness = 5 mm,  
24 FOV = 192 mm × 220 mm, matrix size = 179 × 256). The presence of nonhemorrhagic and  
25 microhemorrhagic lesions was independently determined by experienced clinical

1 neuroradiologists (with 9 and 10 years of experience) who assessed multiple modalities of  
2 neuroimaging data acquired at baseline (T1-FLAIR; T2-FLAIR; susceptibility weighted  
3 imaging, SWI). All subjects were free of any nonhemorrhagic or microhemorrhagic lesions.

4 **Cortical thickness measurements.** The T1-weighted images were then preprocessed to create  
5 a 3D model of the cortical surface for further measurements by using the FreeSurfer version  
6 5.2.0 pipeline (<http://www.freesurfer.net>)<sup>59</sup>. The pipeline included motion correction, nonbrain  
7 tissue removal, Talairach transformation, intensity normalization, and white/gray matter  
8 segmentation with automatic topology correction<sup>59</sup>. This was followed by registering each  
9 subject to a spherical atlas based on parcellation of the cerebral cortex from regions specified  
10 by the Destrieux atlas<sup>60</sup>. Regions of interest (ROIs) were selected to include the limbic system  
11 (such as the bilateral insula, subcallosal area and Hipp/PH), which are thought to be important  
12 in gastrointestinal disorders<sup>61</sup>. The insula was also divided into several subsections according  
13 to Destrieux et al<sup>60</sup>. The thickness of each ROI was calculated as the closest distance between  
14 the gray-white matter boundary and the pial mesh at each vertex on the tessellated surface<sup>59,62</sup>.  
15 The regional cortical thickness was then calculated as the mean thickness of vertices belonging  
16 to ROIs in both hemispheres separately and adjusted for total ICV.

17 **White matter hyperintensity (WMH) quantification.** Cerebrovascular injury is  
18 characterized by typical radiological changes on MRI as WMH. WMH quantification was  
19 conducted using the T1-weighted and FLAIR images following the Lesion Segmentation  
20 Toolbox (LST) pipeline previously described<sup>63</sup>. After data quality control, 20 mild TBI patients  
21 and demographically 29 matched HCs from the original neuroimaging subgroup were used for  
22 WMH measurements. WMH quantification consisted of the following automated steps: T1-  
23 weighted and FLAIR images were skull-stripped and intensity-corrected using the VBM8  
24 toolbox in the Statistical Parametric Mapping (SPM) package. Corrected T1-weighted and  
25 FLAIR images were linearly (12-parameter affine) and nonlinearly coregistered. A lesion belief

1 map based on the FLAIR and T1-weighted image was then produced by computing an initial  
2 tissue segmentation of the T1-weighted image<sup>63</sup>. This map was refined iteratively weighting  
3 the likelihood of belonging to WM or gray matter (GM) against the likelihood of belonging to  
4 lesions until no further voxels were assigned to lesions. After thresholding this map with a  
5 prechosen initial threshold (k), a lesion map is produced that is subsequently grown along  
6 voxels that exhibited hyperintensity in the FLAIR image. The present study set the initial  
7 threshold  $k = 0.3$ , which is proven to be useful in previous studies<sup>64</sup>. Estimated lesion masks  
8 were then automatically filled using an internal filling method proposed by Chard et al<sup>65</sup>.  
9 Candidate region voxels were replaced by random intensities from a Gaussian distribution  
10 generated from the normal-appearing WM intensities and then filtered to reintroduce the  
11 original spatial variation in WM. All imaging analyses were completed without knowledge of  
12 demographic and clinical data. The results were also visually inspected for misclassification  
13 by one trained rater blinded to the clinical data. A “lobar” atlas was also coregistered linearly  
14 to each labeled FLAIR image to define WMH volumes in the frontal, temporal, parietal, and  
15 occipital lobes separately<sup>66</sup>. WMH volume was defined as the sum of the labeled voxels  
16 multiplied by voxel dimensions; regional volumes were calculated within each labeled lobar  
17 region of interest. In an independent cohort of 20 participants, test-retest reliability was greater  
18 than 0.98 for both total and regional WMH volumes. Because the distribution of total WMH  
19 volume across the population was skewed, it was log-transformed to normalize the distribution.  
20 To control for variations in head size<sup>67</sup>, ICV (intracranial volume, brain plus associated CSF  
21 with the inner table of the skull as the outer boundary of the segmented image) were also  
22 defined using the Brain Extraction Tool (BET) from FSL<sup>68</sup> with manual modifications  
23 performed by trained raters. WMH volumes were calculated in ml, corrected for ICV<sup>69</sup>. ICV  
24 were also used as a covariate for further between-group comparison and correlation analysis.  
25 **Construction of the prediction model based on gut microbiome, serum blood molesules**

1 **and fMRI data.** Five-fold cross-validation was performed ten times on a random forest model  
2 using the genus abundance profiles of mild TBI patients and HCs. The test error curves from  
3 ten trials of five-fold cross-validation were averaged. The classifier model was then chosen  
4 based on the minimized sum of the test error and its standard deviation in the averaged curve<sup>70</sup>.  
5 The probability of mild TBI was calculated using this set of genera, and a receiver operating  
6 characteristic (ROC) curve was drawn (R 3.3.2, pROC package). The correlation between gut  
7 bacteria abundance and RPCS scores was calculated by partial Spearman's rank correlation.  
8 Finally, we assessed the possible confounding effects of age, BMI, sex and diet on our random  
9 forest model following the procedures of Zeller et al.<sup>70</sup> ( $\chi^2$  test, Supplementary Data 5).

10 To further illustrate the relationship between the gut microbiota, serum blood biomarkers and  
11 fMRI data and consider that the disproportion between the samples and parameters used in the  
12 prediction model (43 samples and 16 parameters), least absolute shrinkage and selection  
13 operator (LASSO) regression was performed to avoid model overfitting<sup>71</sup>. Some variables were  
14 eliminated according to penalty rules and potential predictors with non-zero coefficients were  
15 removed in LASSO regression<sup>72</sup>. We carried out cross-validation to determine the penalty  
16 parameter lambda using the glmnet package (R 3.3.2). We chose the optimal lambda value  
17 which minimized the cross-validation error mean and determine the potential parameters<sup>73</sup>. The  
18 power of the prediction model was determined by drawing a receiver operating characteristic  
19 curve.

20 **Statistical Analysis.** Statistical analyses were performed in SPSS 20.0, and graphs were  
21 generated in R (version: 3.6.2). Data are shown as the mean  $\pm$  standard deviation (SD),  
22 median and interquartile range, or frequency and percent as indicated. The normal  
23 distribution of continuous variables was measured by the Shapiro–Wilk test. The independent  
24 two-sample t-test and the Mann-Whitney test were used to compare group differences based  
25 on data normality.  $\chi^2$  tests were applied to assess categorical variables. The relative abundance

1 of each genus was compared between the patients and controls via the Wilcoxon rank-sum test  
2 followed by Storey's FDR correction. Only somatic symptoms with prevalence in over 30% of  
3 all patients were selected for further correlation analysis with gut microbes. Correlation  
4 analyses between the microbiota, RPCS, cortical thickness and WMH data were performed  
5 using partial Spearman's rank-based correlation, controlling for age, sex, education, BMI,  
6 smoking, drinking and bowel habits, while the same analysis was applied to the relationship  
7 between microbiota and serum molecules by adjusting for age, gender, BMI and dietary habits  
8 (R 3.3.2, ppcor package). When analyzing the association between serum blood biomarkers  
9 and fMRI data, age, gender, education and BMI were taken into account. In addition, we also  
10 conducted surface-based between-group comparisons on specific regional cortical thicknesses  
11 using general linear models adjusted for age, sex, education, BMI, smoking, drinking bowel  
12 habits and whole-brain mean cortical thickness.  $P < 0.05$  was considered statistically  
13 significant, and FDR correction was performed for multiple comparisons in all the above  
14 analyses.

## 15 **Acknowledgements**

16 This study is supported by the National Natural Science Foundation of China (Grant No.  
17 81771914 and 81671671), and Natural Science Foundation of Zhejiang Province (Grant No.  
18 LY19H180003).

## 19 **Data availability statement**

20 16sRNA sequencing data for donors samples have been deposited in the  
21 CNGB Nucleotide Sequence Archive (CNSA) database under accession identification  
22 CNP0000119 and in the European Nucleotide Archive (ENA) database under accession  
23 identification code ERP111403. The source data underlying all figures except for those  
24 not including statistics are provided as a Source Data file.

## 1 **Code availability**

2 The following softwares were used: FLASH version 1.2.11, Trimmomatic version 0.33,  
3 UCHIME version 8.1, RDP Classifier version 2.2, Mothur version v.1.30, Cytoscape v3.4.0,  
4 STAMP v2.1.3. The following R packages were used: ppcor 1.0, ade4 1.7–13, pROC 1.12.1,  
5 randomForest 4.6–14.

## 6 **Author contributions**

7 L.B. and F.Z: design and conceptualization of the study, interpretation of the data, drafting the  
8 manuscript. T.L.: analysis of the data, drafting the manuscript; S. W., S. G, X. J, X. Y, Y. S., F.  
9 X. and X. M: analysis and interpretation of the data; B. Y., Y. R., G. B., Z. Y: collecting the  
10 data and revising the manuscript for intellectual content; L.B., M.Z. and Z.Y: obtained funding.

## 11 **Competing interests**

12 The authors declare no competing financial interests.

## 13 **Materials & Correspondence**

14 F.Z. addressed the material requests.

15

## 1 References

- 2 1. Maas, A.I.R. *et al.* Traumatic brain injury: integrated approaches to improve prevention, clinical care,  
3 and research. *Lancet Neurol* **16**, 987-1048 (2017).  
4
- 5 2. Rothhammer, V. *et al.* Microglial control of astrocytes in response to microbial metabolites. *Nature* **557**,  
6 724-728 (2018).  
7
- 8 3. Zhu, C.S., Grandhi, R., Patterson, T.T. & Nicholson, S.E. A Review of Traumatic Brain Injury and the Gut  
9 Microbiome: Insights into Novel Mechanisms of Secondary Brain Injury and Promising Targets for  
10 Neuroprotection. *Brain Sci* **8** (2018).  
11
- 12 4. Sommer, F. & Backhed, F. The gut microbiota--masters of host development and physiology. *Nat Rev*  
13 *Microbiol* **11**, 227-238 (2013).  
14
- 15 5. Sagarkar, S. *et al.* Traumatic stress-induced persistent changes in DNA methylation regulate  
16 neuropeptide Y expression in rat jejunum. *Neurogastroenterol Motil* **29** (2017).  
17
- 18 6. Olsen, A.B. *et al.* Effects of traumatic brain injury on intestinal contractility. *Neurogastroenterol Motil*  
19 **25**, 593-e463 (2013).  
20
- 21 7. Smith, K. TBI affects intestinal motility. *Nat Rev Gastroenterol Hepatol* **10**, 260 (2013).  
22
- 23 8. Bansal, V. *et al.* Traumatic brain injury and intestinal dysfunction: uncovering the neuro-enteric axis. *J*  
24 *Neurotrauma* **26**, 1353-1359 (2009).  
25
- 26 9. Houlden, A. *et al.* Brain injury induces specific changes in the caecal microbiota of mice via altered  
27 autonomic activity and mucoprotein production. *Brain Behav Immun* **57**, 10-20 (2016).  
28
- 29 10. Mac Donald, C.L. *et al.* Early Clinical Predictors of 5-Year Outcome After Concussive Blast Traumatic Brain  
30 Injury. *JAMA Neurol* **74**, 821-829 (2017).  
31
- 32 11. Gardner, R.C. & Yaffe, K. Epidemiology of mild traumatic brain injury and neurodegenerative disease.  
33 *Mol Cell Neurosci* **66**, 75-80 (2015).  
34
- 35 12. Perry, D.C. *et al.* Association of traumatic brain injury with subsequent neurological and psychiatric  
36 disease: a meta-analysis. *J Neurosurg* **124**, 511-526 (2016).  
37
- 38 13. Sampson, T.R. *et al.* Gut Microbiota Regulate Motor Deficits and Neuroinflammation in a Model of  
39 Parkinson's Disease. *Cell* **167**, 1469-1480 e1412 (2016).  
40
- 41 14. Kim, S. *et al.* Transneuronal Propagation of Pathologic alpha-Synuclein from the Gut to the Brain Models  
42 Parkinson's Disease. *Neuron* **103**, 627-641 e627 (2019).  
43
- 44 15. Itzhaki, R.F. *et al.* Microbes and Alzheimer's Disease. *J Alzheimers Dis* **51**, 979-984 (2016).  
45
- 46 16. Singh, V. *et al.* Microbiota Dysbiosis Controls the Neuroinflammatory Response after Stroke. *J Neurosci*  
47 **36**, 7428-7440 (2016).  
48
- 49 17. Levin, H.S. & Diaz-Arrastia, R.R. Diagnosis, prognosis, and clinical management of mild traumatic brain  
50 injury. *Lancet Neurol* **14**, 506-517 (2015).  
51
- 52 18. Wang, Z. *et al.* Single mild traumatic brain injury deteriorates progressive inter-hemispheric functional  
53 and structural connectivity. *J Neurotrauma* (2019).  
54
- 55 19. Niu, X. *et al.* Disruption of periaqueductal grey-default mode network functional connectivity predicts

- 1 persistent post-traumatic headache in mild traumatic brain injury. *J Neurol Neurosurg Psychiatry* **90**,  
2 326-332 (2019).  
3
- 4 20. Cole, J.H., Leech, R., Sharp, D.J. & Alzheimer's Disease Neuroimaging, I. Prediction of brain age suggests  
5 accelerated atrophy after traumatic brain injury. *Ann Neurol* **77**, 571-581 (2015).  
6
- 7 21. Sowell, E.R. *et al.* Mapping cortical change across the human life span. *Nat Neurosci* **6**, 309-315 (2003).  
8
- 9 22. Kaczurkin, A.N. *et al.* Evidence for Dissociable Linkage of Dimensions of Psychopathology to Brain  
10 Structure in Youths. *Am J Psychiatry* **176**, 1000-1009 (2019).  
11
- 12 23. Griffin, A.D. *et al.* Traumatic microbleeds suggest vascular injury and predict disability in traumatic brain  
13 injury. *Brain* **142**, 3550-3564 (2019).  
14
- 15 24. Zlokovic, B.V. Neurovascular pathways to neurodegeneration in Alzheimer's disease and other disorders.  
16 *Nat Rev Neurosci* **12**, 723-738 (2011).  
17
- 18 25. Iadecola, C. The pathobiology of vascular dementia. *Neuron* **80**, 844-866 (2013).  
19
- 20 26. Arvanitakis, Z., Capuano, A.W., Leurgans, S.E., Bennett, D.A. & Schneider, J.A. Relation of cerebral vessel  
21 disease to Alzheimer's disease dementia and cognitive function in elderly people: a cross-sectional  
22 study. *Lancet Neurol* **15**, 934-943 (2016).  
23
- 24 27. Iturria-Medina, Y. *et al.* Early role of vascular dysregulation on late-onset Alzheimer's disease based on  
25 multifactorial data-driven analysis. *Nat Commun* **7**, 11934 (2016).  
26
- 27 28. Singh, R. *et al.* Relationship of collegiate football experience and concussion with hippocampal volume  
28 and cognitive outcomes. *JAMA* **311**, 1883-1888 (2014).  
29
- 30 29. Ward, T. *et al.* BugBase Predicts Organism Level Microbiome Phenotypes. (2017).  
31
- 32 30. Gill, J. *et al.* Glial fibrillary acidic protein elevations relate to neuroimaging abnormalities after mild TBI.  
33 *Neurology* **91**, e1385-e1389 (2018).  
34
- 35 31. Robinson, S. *et al.* Microstructural and microglial changes after repetitive mild traumatic brain injury in  
36 mice. *J Neurosci Res* **95**, 1025-1035 (2017).  
37
- 38 32. Sun, Y. *et al.* Elevated Serum Levels of Inflammation-Related Cytokines in Mild Traumatic Brain Injury  
39 Are Associated With Cognitive Performance. *Front Neurol* **10**, 1120 (2019).  
40
- 41 33. Chen, H.I., Burke, J.F. & Cohen, A.S. Editorial: Traumatic Brain Injury As a Systems Neuroscience Problem.  
42 *Front Syst Neurosci* **10**, 100 (2016).  
43
- 44 34. Rogers, G.B. *et al.* From gut dysbiosis to altered brain function and mental illness: mechanisms and  
45 pathways. *Molecular psychiatry* **21**, 738-748 (2016).  
46
- 47 35. Shahjouei, S. *et al.* The diagnostic values of UCH-L1 in traumatic brain injury: A meta-analysis. *Brain Inj*  
48 **32**, 1-17 (2018).  
49
- 50 36. Helmy, A., Carpenter, K.L., Menon, D.K., Pickard, J.D. & Hutchinson, P.J. The cytokine response to human  
51 traumatic brain injury: temporal profiles and evidence for cerebral parenchymal production. *J Cereb*  
52 *Blood Flow Metab* **31**, 658-670 (2011).  
53
- 54 37. White, B.D. *et al.* Beta-catenin signaling increases in proliferating NG2+ progenitors and astrocytes  
55 during post-traumatic gliogenesis in the adult brain. *Stem Cells* **28**, 297-307 (2010).  
56
- 57 38. Vemuri, P. *et al.* Development of a cerebrovascular magnetic resonance imaging biomarker for cognitive

- 1 aging. *Ann Neurol* **84**, 705-716 (2018).  
2
- 3 39. Hoban, A.E. *et al.* Regulation of prefrontal cortex myelination by the microbiota. *Transl Psychiatry* **6**,  
4 e774 (2016).  
5
- 6 40. Kalaria, R.N., Akinyemi, R. & Ihara, M. Does vascular pathology contribute to Alzheimer changes? *J*  
7 *Neurol Sci* **322**, 141-147 (2012).  
8
- 9 41. Wang, K. *et al.* HIF-1alpha and VEGF Are Involved in Deferoxamine-Ameliorated Traumatic Brain Injury.  
10 *J Surg Res* **246**, 419-426 (2020).  
11
- 12 42. Ozevren, H., Deveci, E. & Tuncer, M.C. Histopathological changes in the choroid plexus after traumatic  
13 brain injury in the rats: a histologic and immunohistochemical study. *Folia Morphol (Warsz)* **77**, 642-648  
14 (2018).  
15
- 16 43. Craig, A.D. How do you feel? Interoception: the sense of the physiological condition of the body. *Nat*  
17 *Rev Neurosci* **3**, 655-666 (2002).  
18
- 19 44. Hong, J.Y. *et al.* Regional neuroplastic brain changes in patients with chronic inflammatory and non-  
20 inflammatory visceral pain. *PLoS One* **9**, e84564 (2014).  
21
- 22 45. Chua, C.S. *et al.* Negative correlation of cortical thickness with the severity and duration of abdominal  
23 pain in Asian women with irritable bowel syndrome. *PLoS One* **12**, e0183960 (2017).  
24
- 25 46. Pennisi, E. Meet the psychobiome. *Science* **368**, 570-573 (2020).  
26
- 27 47. Zhu, S. *et al.* The progress of gut microbiome research related to brain disorders. *J Neuroinflammation*  
28 **17**, 25 (2020).  
29
- 30 48. Wen, L. *et al.* Investigating Alterations in Caecum Microbiota After Traumatic Brain Injury in Mice.  
31 *Journal of visualized experiments : JoVE* (2019).  
32
- 33 49. Nicholson, S.E. *et al.* Moderate Traumatic Brain Injury Alters the Gastrointestinal Microbiome in a Time-  
34 Dependent Manner. *Shock* **52**, 240-248 (2019).  
35
- 36 50. Matharu, D. *et al.* Repeated mild traumatic brain injury affects microbial diversity in rat jejunum. *J Biosci*  
37 **44** (2019).  
38
- 39 51. Treangen, T.J., Wagner, J., Burns, M.P. & Villapol, S. Traumatic Brain Injury in Mice Induces Acute  
40 Bacterial Dysbiosis Within the Fecal Microbiome. *Front Immunol* **9**, 2757 (2018).  
41
- 42 52. Holm, L., Cassidy, J.D., Carroll, L.J., Borg, J. & Neurotrauma Task Force on Mild Traumatic Brain Injury of  
43 the, W.H.O.C.C. Summary of the WHO Collaborating Centre for Neurotrauma Task Force on Mild  
44 Traumatic Brain Injury. *J Rehabil Med* **37**, 137-141 (2005).  
45
- 46 53. King, N.S., Crawford, S., Wenden, F.J., Moss, N.E. & Wade, D.T. The Rivermead Post Concussion  
47 Symptoms Questionnaire: a measure of symptoms commonly experienced after head injury and its  
48 reliability. *J Neurol* **242**, 587-592 (1995).  
49
- 50 54. Long, M. *et al.* Combined Use of *C. butyricum* Sx-01 and *L. salivarius* C-1-3 Improves Intestinal Health  
51 and Reduces the Amount of Lipids in Serum via Modulation of Gut Microbiota in Mice. *Nutrients* **10**  
52 (2018).  
53
- 54 55. Edgar, R.C. UPARSE: highly accurate OTU sequences from microbial amplicon reads. *Nat Methods* **10**,  
55 996-998 (2013).  
56
- 57 56. Schloss, P.D. *et al.* Introducing mothur: open-source, platform-independent, community-supported

- 1 software for describing and comparing microbial communities. *Appl Environ Microbiol* **75**, 7537-7541  
2 (2009).  
3
- 4 57. Segata, N. *et al.* Metagenomic biomarker discovery and explanation. *Genome Biol* **12**, R60 (2011).  
5
- 6 58. Soo, R.M. *et al.* An expanded genomic representation of the phylum cyanobacteria. *Genome Biol Evol*  
7 **6**, 1031-1045 (2014).  
8
- 9 59. Li, S. *et al.* Posttraumatic Stress Disorder: Structural Characterization with 3-T MR Imaging. *Radiology*  
10 **280**, 537-544 (2016).  
11
- 12 60. Destrieux, C., Fischl, B., Dale, A. & Halgren, E. Automatic parcellation of human cortical gyri and sulci  
13 using standard anatomical nomenclature. *Neuroimage* **53**, 1-15 (2010).  
14
- 15 61. Mertz, H. Role of the brain and sensory pathways in gastrointestinal sensory disorders in humans. *Gut*  
16 **51 Suppl 1**, i29-33 (2002).  
17
- 18 62. He, Y. *et al.* Impaired small-world efficiency in structural cortical networks in multiple sclerosis  
19 associated with white matter lesion load. *Brain* **132**, 3366-3379 (2009).  
20
- 21 63. Schmidt, P. *et al.* An automated tool for detection of FLAIR-hyperintense white-matter lesions in  
22 Multiple Sclerosis. *Neuroimage* **59**, 3774-3783 (2012).  
23
- 24 64. Muhlau, M. *et al.* White-matter lesions drive deep gray-matter atrophy in early multiple sclerosis:  
25 support from structural MRI. *Mult Scler* **19**, 1485-1492 (2013).  
26
- 27 65. Chard, D.T., Jackson, J.S., Miller, D.H. & Wheeler-Kingshott, C.A. Reducing the impact of white matter  
28 lesions on automated measures of brain gray and white matter volumes. *J Magn Reson Imaging* **32**,  
29 223-228 (2010).  
30
- 31 66. Teipel, S.J. *et al.* Dissociation between corpus callosum atrophy and white matter pathology in  
32 Alzheimer's disease. *Neurology* **51**, 1381-1385 (1998).  
33
- 34 67. Thomas, D.A., Libon, D.J. & Ledakis, G.E. Treating dementia patients with vascular lesions with donepezil:  
35 a preliminary analysis. *Appl Neuropsychol* **12**, 12-18 (2005).  
36
- 37 68. Smith, S.M. Fast robust automated brain extraction. *Hum Brain Mapp* **17**, 143-155 (2002).  
38
- 39 69. van Leijssen, E.M.C. *et al.* Nonlinear temporal dynamics of cerebral small vessel disease: The RUN DMC  
40 study. *Neurology* **89**, 1569-1577 (2017).  
41
- 42 70. Zeller, G. *et al.* Potential of fecal microbiota for early-stage detection of colorectal cancer. *Mol Syst Biol*  
43 **10**, 766 (2014).  
44
- 45 71. Sauerbrei, W., Royston, P. & Binder, H. Selection of important variables and determination of functional  
46 form for continuous predictors in multivariable model building. *Stat Med* **26**, 5512-5528 (2007).  
47
- 48 72. Gao, J.B., Kwan, P.W. & Shi, D.M. Sparse kernel learning with LASSO and Bayesian inference algorithm.  
49 *Neural Networks* **23**, 257-264 (2010).  
50
- 51 73. Tibshirani, R. The lasso method for variable selection in the cox model. *Stat Med* **16**, 385-395 (1997).  
52  
53



**sFig. 1.** PCoA based on the Bray-Curtis matrix showed that the overall fecal microbiota composition was significantly different between patients and controls ( $P = 0.001$ ).  $P$  values were calculated by the PERMANOVA test. PCoA, principal coordinate analysis; mTBI, mild traumatic brain injury; HCs, healthy controls. See detailed statistical data in supplementary Source Data file.



**sFig. 2** Network of genera differentially enriched in healthy controls and mild TBI patients. Node sizes reflect the mean abundance of significant genera. genus annotated to species are colored according to class (red edges, Spearman's rank correlation coefficient > 0.4, P < 0.05; blue edges, Spearman's rank correlation coefficient < -0.4, P < 0.05;). See detailed statistical data in the supplementary Source Data file.



**sFig. 3** Serum molecule-based discrimination between patients with mild traumatic brain injury (mTBI) and healthy controls. **a.** A classifier containing blood serum biomarkers was selected by the cross-validated random forest models according to 56 patients and 46 controls. The area under the receiver operating characteristic curve (AUC) and the 95% confidence intervals are also shown. **b.** The length of the line indicates the contribution of the serum biomarkers to the discriminative model. See detailed statistical data in supplementary Source Data file.



**sFig. 4** Selection of the optimal parameters used for construction of the optimal prediction model by LASSO regression. (a) Selection of optimal parameter (lambda) in the LASSO model, dotted vertical lines were drawn at the optimal values. (b) LASSO coefficient profiles of the 12 parameters, including 5 genus, 3 serum blood biomarkers and 4 parameters of fMRI data with nonzero coefficients determined by the optimal lambda. (c) The power of the prediction model constructed based no minimum cross-validation error mean was evaluated by Receiver operating characteristic curve (ROC). The area under the receiver operating characteristic curve (AUC) and the 95% confidence intervals are also shown. 15 patients with mild traumatic brain injury and 28 health control were included in this model. See detailed statistical data in supplementary Source Data file.
